# Supplementary material for: Electronic effects due to organic linker-metal surface interactions: implications on screening of MOF-encapsulated catalysts
Source: Royal Society of Chemistry journal article supplement (doi:10.1039/c9cp05380h), 2020-01-01
Supplement: c9cp05380h1.pdf [file c9cp05380h1.pdf]

## SUPPLEMENTARY INFORMATION

### **Electronic effects due to organic linker-metal surface interactions: implications on screening of MOF-encapsulated catalysts**

Benjamin Schweitzer,<sup>a</sup> ‡ Chloe Archuleta,<sup>a</sup> ‡ Bomsaerah Seong,<sup>a</sup> Ryther Anderson,<sup>a</sup> Diego A. Gómez-Gualdrón<sup>a</sup> \*

<sup>a</sup> Department of Chemical and Biological Engineering, Colorado School of Mines, Golden CO 80401, USA

\*Corresponding author: dgomezgualdron@mines.edu

‡ These authors contributed equally

#### **Table of contents**

##### **Section**

##### **Page**

|                                            |     |
|--------------------------------------------|-----|
| <b>S1</b> Additional Simulation Data ..... | S2  |
| <b>S2</b> Details of Model Training .....  | S18 |
| References .....                           | S18 |

## Section S1. Additional Simulation Data

|                     | Benzene dicarboxylate                                                                                                                                                                                                                                                                               | Acrylate                                                                                                                                                                                            |
|---------------------|-----------------------------------------------------------------------------------------------------------------------------------------------------------------------------------------------------------------------------------------------------------------------------------------------------|-----------------------------------------------------------------------------------------------------------------------------------------------------------------------------------------------------|
| charge distribution | 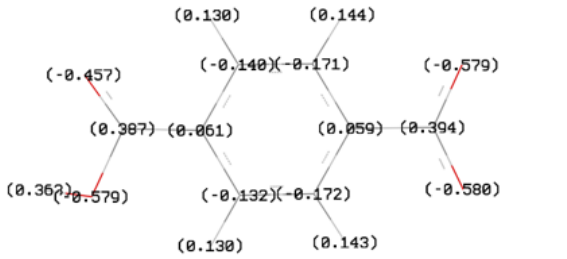 <p>Partial charges for Benzene dicarboxylate: (0.130), (0.144), (-0.457), (-0.140), (-0.171), (-0.579), (0.387), (0.061), (0.059), (0.394), (0.362), (0.579), (-0.132), (-0.172), (-0.580), (0.130), (0.143).</p> |  <p>Partial charges for Acrylate: (0.118), (-0.609), (0.052), (-0.313), (-0.087), (0.395), (0.052), (-0.618).</p> |
| LUMO                |                                                                                                                                                                                                                    |                                                                                                                   |

**Figure S1.** Comparison of electronic properties of benzene dicarboxylate (BDC), a common MOF linker, and acrylate, which is used to approximate the carboxylate moiety of BDC. Notice that (i) charges on the carboxylate moiety are similar in BDC and acrylate, and (ii) the shape of the LUMO on the  $\alpha$ -C and carboxylate group are similar in BDC and acrylate.

**Table S1.** d-band center (eV) for reference surfaces

| Metal | Linker-free slab | H-added Linker-free slab |
|-------|------------------|--------------------------|
| Zn    | -6.93            | -                        |
| Ag    | -3.76            | -                        |
| Au    | -3.21            | -3.34                    |
| Cu    | -2.33            | -2.34                    |
| Pt    | -2.24            | -2.25                    |
| Pd    | -1.62            | -1.59                    |
| Ni    | -1.47            | -1.47                    |

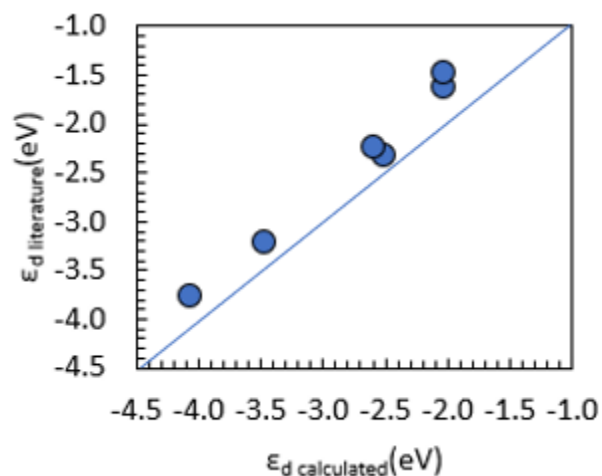

**Figure S2.** Parity plot comparing d-band center calculated by us (horizontal axis) on bare (i.e. linker-free) metal surfaces and those reported by Goddard and coworkers<sup>1</sup> (vertical axis).

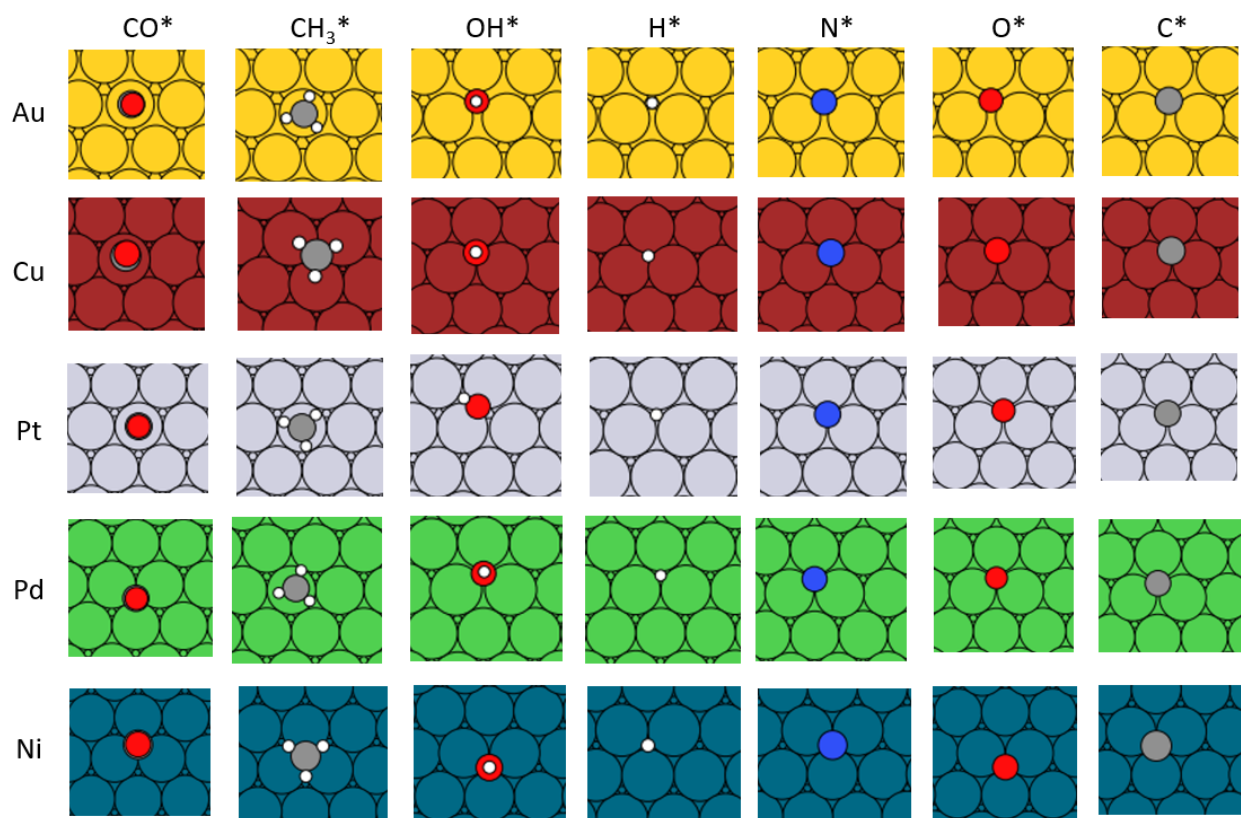

**Figure S3.** Optimized binding configurations of small adsorbates on bare surfaces.

**Table S2.** Binding energies  $E_{\text{ads}}$  (kJ/mol) of chemisorbed species on linker-free surfaces. Adsorption site is indicated as superscript.  $t$  = top site,  $f$  = fcc hollow site,  $h$  = hcp hollow site,  $b$  = bridge site.

| Species           | bare surface        |                     |                     |                     |                     | H-added surface     |                     |                     |                     |                     |
|-------------------|---------------------|---------------------|---------------------|---------------------|---------------------|---------------------|---------------------|---------------------|---------------------|---------------------|
|                   | Au                  | Cu                  | Pt                  | Pd                  | Ni                  | Au                  | Cu                  | Pt                  | Pd                  | Ni                  |
| CO*               | -43 <sup>(t)</sup>  | -101 <sup>(t)</sup> | -205 <sup>(t)</sup> | -221 <sup>(f)</sup> | -205 <sup>(f)</sup> | -46 <sup>(t)</sup>  | -108 <sup>(t)</sup> | -208 <sup>(t)</sup> | -226 <sup>(f)</sup> | -210 <sup>(f)</sup> |
| CH <sub>3</sub> * | -156 <sup>(t)</sup> | -179 <sup>(f)</sup> | -264 <sup>(t)</sup> | -212 <sup>(t)</sup> | -214 <sup>(f)</sup> | -163 <sup>(t)</sup> | -178 <sup>(f)</sup> | -266 <sup>(t)</sup> | -211 <sup>(t)</sup> | -217 <sup>(f)</sup> |
| H*                | -209 <sup>(f)</sup> | -254 <sup>(f)</sup> | -273 <sup>(f)</sup> | -279 <sup>(f)</sup> | -273 <sup>(f)</sup> | -208 <sup>(f)</sup> | -256 <sup>(f)</sup> | -279 <sup>(f)</sup> | -283 <sup>(f)</sup> | -275 <sup>(f)</sup> |
| N*                | -254 <sup>(f)</sup> | -396 <sup>(f)</sup> | -486 <sup>(f)</sup> | -478 <sup>(f)</sup> | -519 <sup>(f)</sup> | -253 <sup>(f)</sup> | -386 <sup>(f)</sup> | -492 <sup>(f)</sup> | -480 <sup>(f)</sup> | -529 <sup>(f)</sup> |
| OH*               | -190 <sup>(f)</sup> | -320 <sup>(f)</sup> | -219 <sup>(b)</sup> | -260 <sup>(f)</sup> | -320 <sup>(f)</sup> | -193 <sup>(f)</sup> | -317 <sup>(f)</sup> | -216 <sup>(b)</sup> | -263 <sup>(f)</sup> | -325 <sup>(f)</sup> |
| O*                | -313 <sup>(f)</sup> | -480 <sup>(f)</sup> | -425 <sup>(f)</sup> | -430 <sup>(f)</sup> | -515 <sup>(f)</sup> | -304 <sup>(f)</sup> | -470 <sup>(f)</sup> | -425 <sup>(f)</sup> | -435 <sup>(f)</sup> | -521 <sup>(f)</sup> |
| C*                | -451 <sup>(f)</sup> | -519 <sup>(f)</sup> | -707 <sup>(f)</sup> | -697 <sup>(f)</sup> | -664 <sup>(f)</sup> | -455 <sup>(f)</sup> | -514 <sup>(f)</sup> | -710 <sup>(f)</sup> | -701 <sup>(f)</sup> | -667 <sup>(f)</sup> |

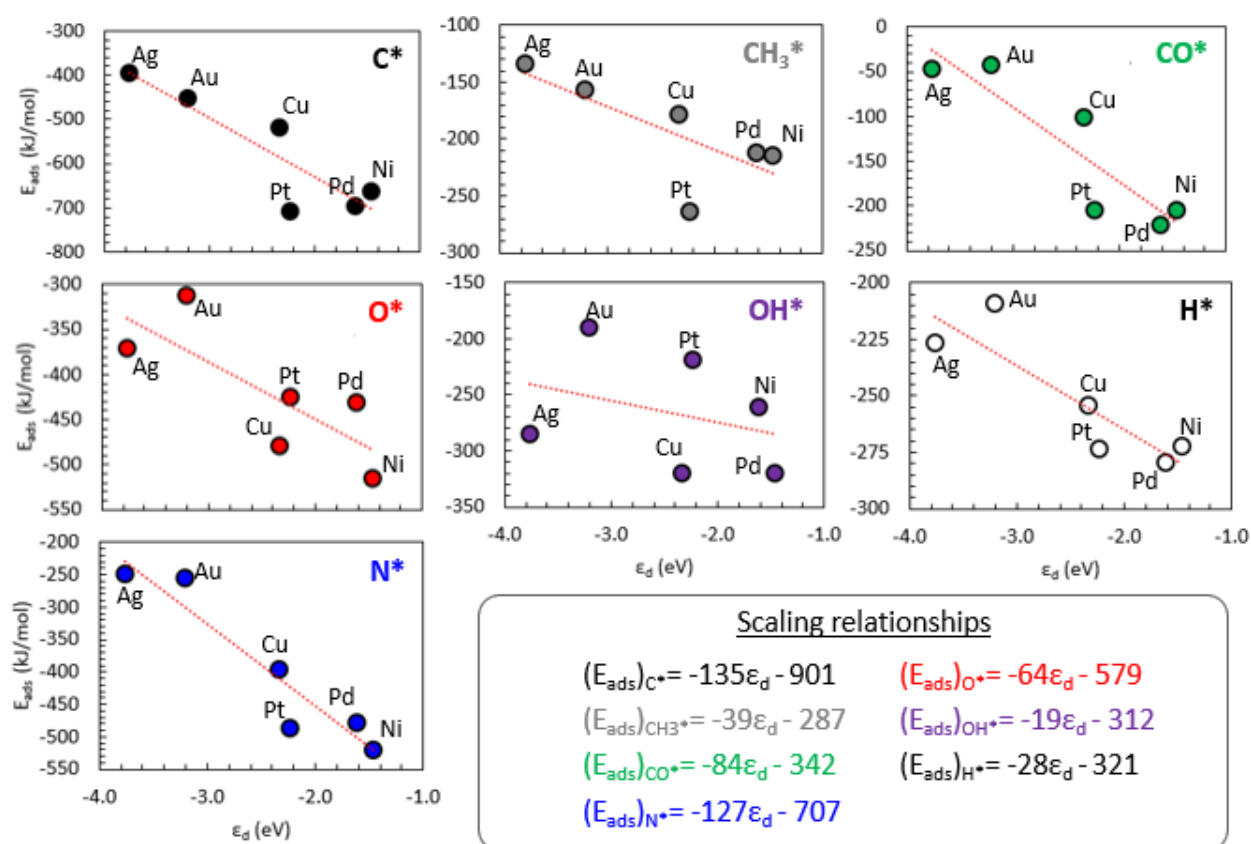

**Figure S4.** Scaling relationships between binding energies ( $E_{\text{ads}}$ ) and d-band centers for bare (i.e. linker-free) metal surfaces.

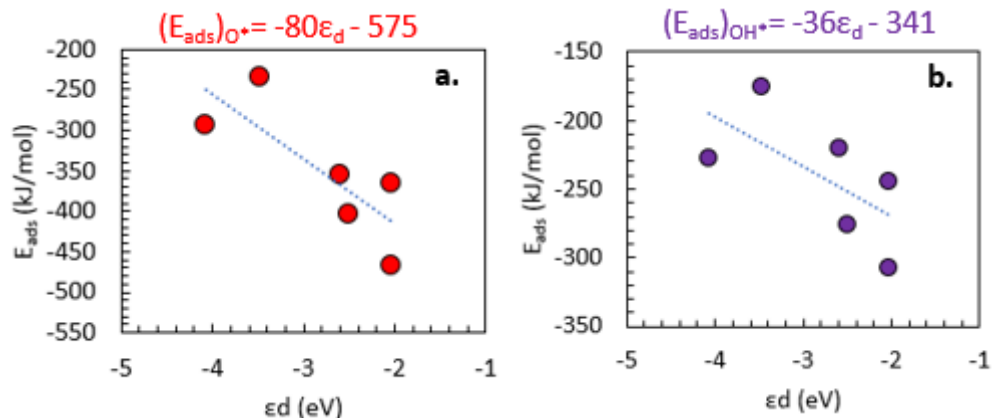

**Figure S5.** Scaling relationships plotted using the binding energy and d-band center data reported by Goddard and coworkers.<sup>1</sup> These plots and scaling relationships provide a comparison of our calculated values with those reported in the literature.

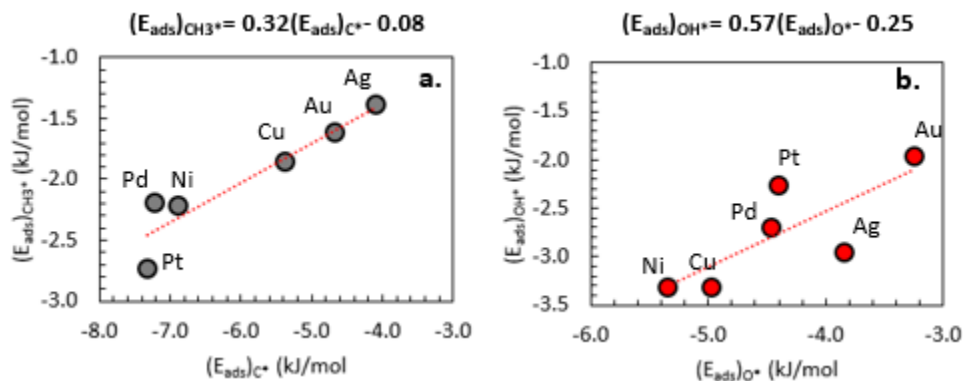

**Figure S6.** Scaling relationships between a)  $\text{CH}_3^*$  and  $\text{C}^*$  and b)  $\text{OH}^*$  and  $\text{O}^*$  binding energies on bare (i.e. linker-free) metal surfaces. As reference, using the RPBE functional, Norskov and coworkers<sup>2</sup> reported a relationship between  $\text{CH}_3^*$  and  $\text{C}^*$  given by  $(E_{\text{ads}})_{\text{CH}_3^*} = 0.26(E_{\text{ads}})_{\text{C}^*} + 0.14$ , and between  $\text{OH}^*$  and  $\text{O}^*$  given by  $(E_{\text{ads}})_{\text{OH}^*} = 0.50(E_{\text{ads}})_{\text{O}^*} - 0.23$ . These plots and scaling relationships provide a comparison of our calculated values with those reported in the literature.

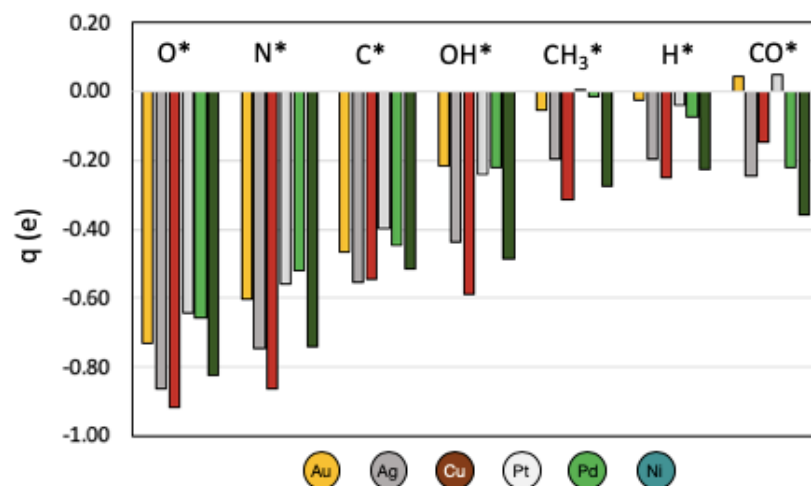

**Figure S7.** Charge of adsorbates on different (111) metal surfaces. Each cluster of bars corresponds to one adsorbate. Color of bars indicate metal surfaces according to color code below the plot.

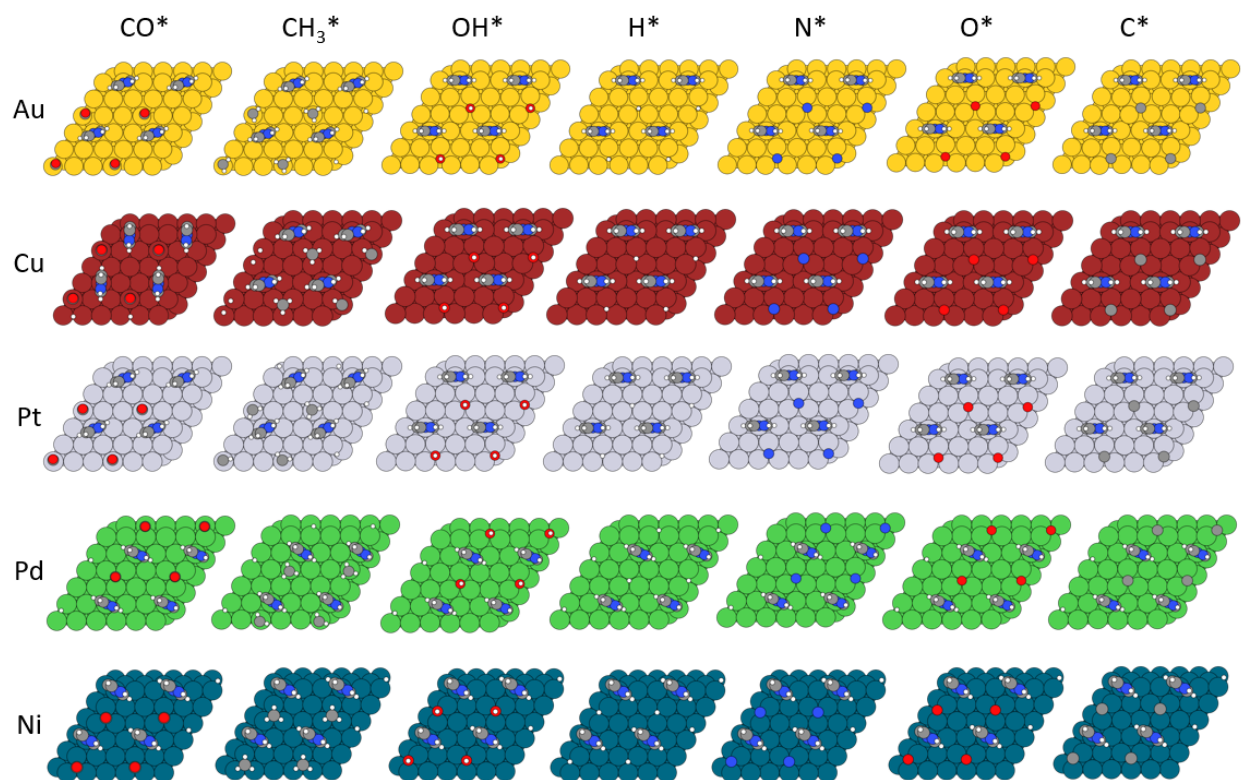

**Figure S8.** Optimized binding configurations of small adsorbates on surface with coordinated imidazole linker.

**Table S3.** Zero-point energy (ZPE) corrections and temperature effects on binding energies for test cases.

| System            | Frequencies<br>(cm <sup>-1</sup> ) | ZPE<br>(kJ/mol) | ZPE effect on<br>E <sub>ads</sub><br>(kJ/mol) | TS <sub>vib</sub> @300 K<br>(kJ/mol) | TS <sub>vib</sub> @423 K<br>(kJ/mol) |
|-------------------|------------------------------------|-----------------|-----------------------------------------------|--------------------------------------|--------------------------------------|
| <i>CO binding</i> |                                    |                 |                                               |                                      |                                      |
| Pt                | 2073, 487, 392,<br>392, 67, 65     | 20              | 8                                             | 14                                   | 26                                   |
| Pt-I              | 2008, 488, 391,<br>375, 92, 62     | 20              | 8                                             | 14                                   | 25                                   |
| Pt-C              | 2053, 488, 406,<br>392, 84, 62     | 20              | 8                                             | 14                                   | 25                                   |
| Pt-T              | 2019, 494, 405,<br>385, 59, 52     | 20              | 8                                             | 15                                   | 27                                   |
| <i>H binding</i>  |                                    |                 |                                               |                                      |                                      |
| Pt                | 2089, 2065, 588                    | 27              | 27                                            | 1                                    | 2                                    |
| Pt-T              | 2081, 2060, 624                    | 27              | 27                                            | 1                                    | 2                                    |
| <i>N binding</i>  |                                    |                 |                                               |                                      |                                      |
| Pt                | 642, 550, 588                      | 10              | 10                                            | 2                                    | 5                                    |
| Pt-T              | 640, 558, 555                      | 10              | 10                                            | 2                                    | 5                                    |

**Table S4.** Binding energy differences of chemisorbed species between the linker-free and imidazolate-coordinated surface.  $\Delta E_{\text{ads}} = (E_{\text{ads}})_{\text{imidazole}} - (E_{\text{ads}})_{\text{bare}}$  and  $\% \Delta E_{\text{ads}} = [(E_{\text{ads}})_{\text{imidazole}} - (E_{\text{ads}})_{\text{bare}}] / (E_{\text{ads}})_{\text{bare}} \times 100$

| Species           | $\Delta E_{\text{ads}}$ (kJ/mol) |     |    |     |     | $\% \Delta E_{\text{ads}}$ |     |    |    |     |
|-------------------|----------------------------------|-----|----|-----|-----|----------------------------|-----|----|----|-----|
|                   | Au                               | Cu  | Pt | Pd  | Ni  | Au                         | Cu  | Pt | Pd | Ni  |
| CO*               | -6                               | -14 | 2  | -18 | -29 | -13                        | -14 | 1  | -8 | -14 |
| CH <sub>3</sub> * | 1                                | 3   | 4  | 2   | 4   | 0                          | 2   | 1  | 1  | 2   |
| H*                | 3                                | 0   | 1  | -3  | -2  | 2                          | 0   | 1  | -1 | -1  |
| N*                | -14                              | -10 | 10 | 0   | -10 | -6                         | -3  | 2  | 0  | -2  |
| OH*               | 6                                | 15  | 30 | 11  | 13  | 3                          | 5   | 14 | 4  | 4   |
| O*                | -10                              | -8  | 11 | -2  | -10 | -3                         | -2  | 3  | -1 | -2  |
| C*                | -14                              | -8  | 15 | 0   | -13 | -3                         | -2  | 2  | 0  | -2  |



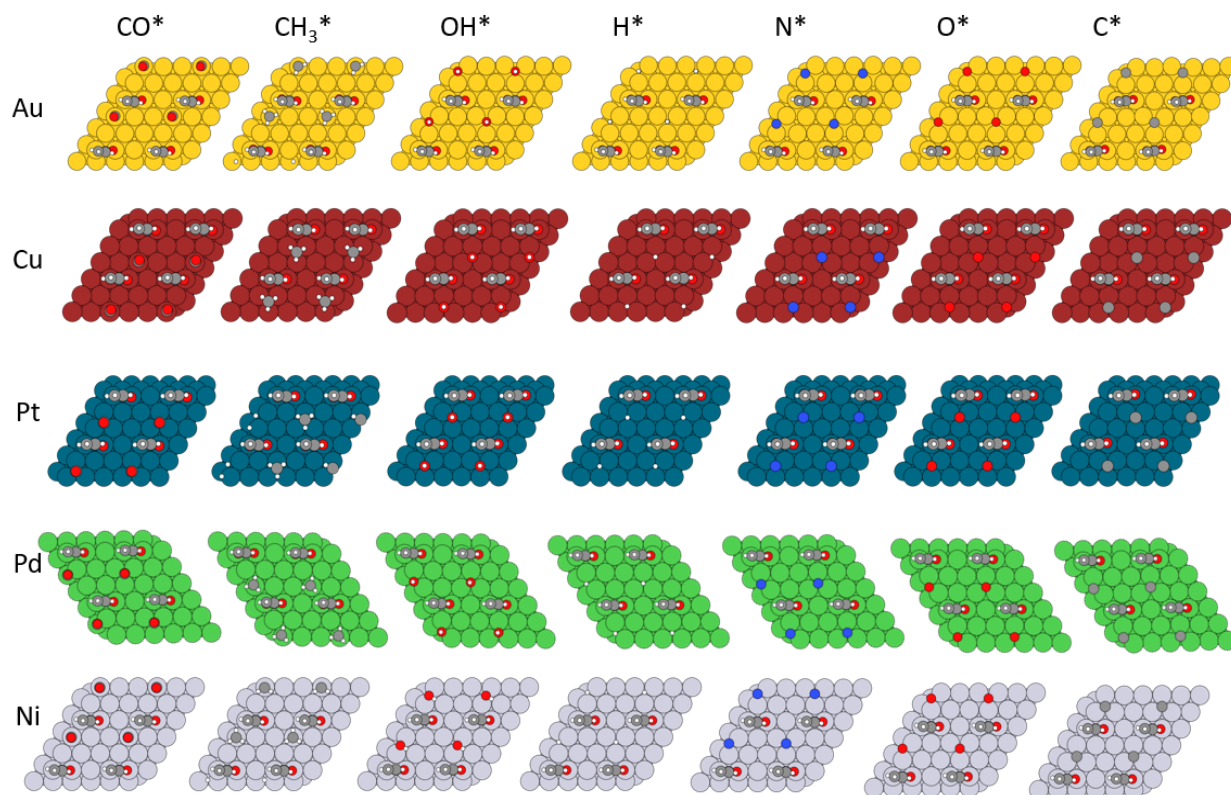

**Figure S9.** Optimized binding configurations of small adsorbates on surface with coordinated carboxylate linker.

**Table S5.** Binding energy differences of chemisorbed species between the linker-free and carboxylate-coordinated surface.  $\Delta E_{\text{ads}} = (E_{\text{ads}})_{\text{carboxylate}} - (E_{\text{ads}})_{\text{bare}}$  and  $\% \Delta E_{\text{ads}} = [(E_{\text{ads}})_{\text{carboxylate}} - (E_{\text{ads}})_{\text{bare}}] / (E_{\text{ads}})_{\text{bare}} \times 100$

| Species           | $\Delta E_{\text{ads}} \text{ (kJ/mol)}$ |     |     |    |     | $\% \Delta E_{\text{ads}}$ |    |    |    |    |
|-------------------|------------------------------------------|-----|-----|----|-----|----------------------------|----|----|----|----|
|                   | Au                                       | Cu  | Pt  | Pd | Ni  | Au                         | Cu | Pt | Pd | Ni |
| CO*               | -16                                      | -4  | 6   | -6 | -6  | -34                        | -3 | 3  | -3 | -3 |
| CH <sub>3</sub> * | -4                                       | -14 | 1   | -7 | -10 | -2                         | -8 | 0  | -3 | -5 |
| H*                | 8                                        | 2   | 5   | -1 | 2   | 4                          | 1  | 2  | 0  | 1  |
| N*                | 10                                       | 3   | 15  | 5  | 5   | 4                          | 1  | 3  | 1  | 1  |
| OH*               | 4                                        | 0   | -18 | 2  | -3  | 2                          | 0  | 2  | 1  | -1 |
| O*                | 4                                        | 4   | 10  | 6  | -3  | 1                          | 1  | 2  | 1  | -1 |
| C*                | 6                                        | 4   | 21  | 3  | 4   | 1                          | 1  | 3  | 0  | 1  |

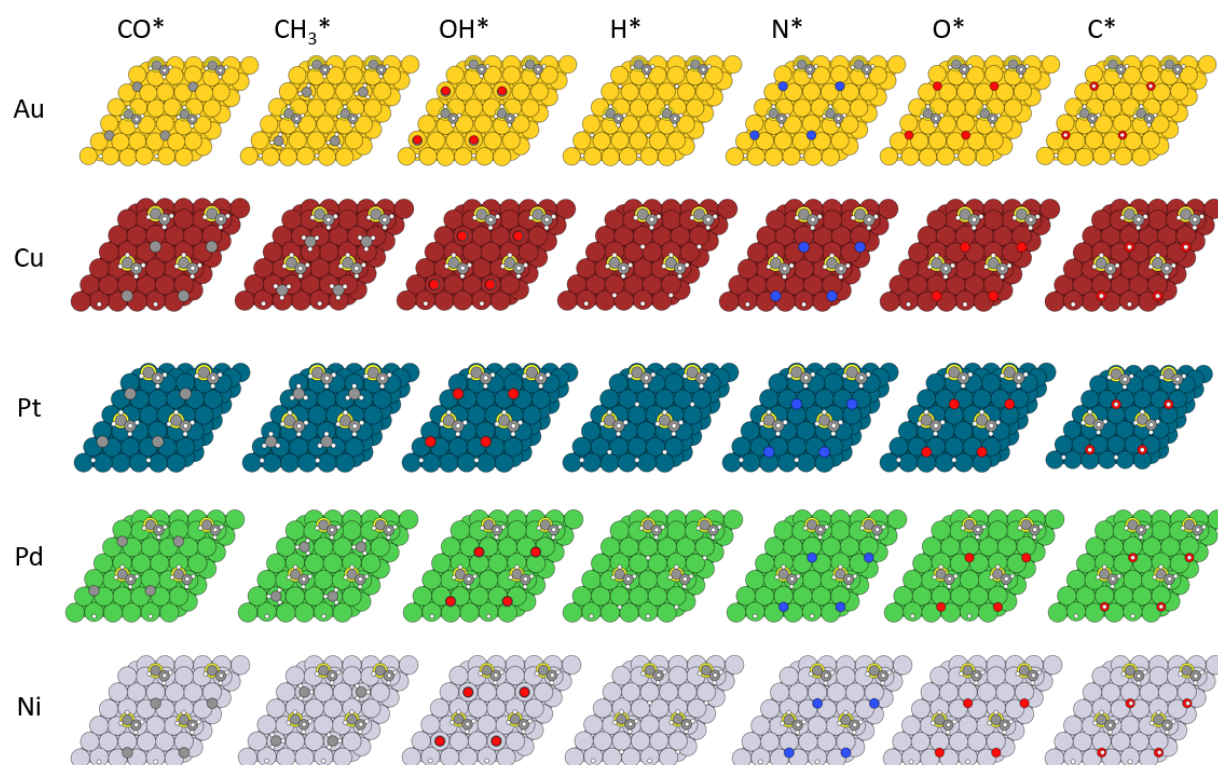

**Figure S10.** Optimized binding configurations of small adsorbates on surface with coordinated carboxylate linker.

**Table S6.** Binding energy differences of chemisorbed species between the linker-free and thiolate-coordinated surface.  $\Delta E_{\text{ads}} = (E_{\text{ads}})_{\text{thiolate}} - (E_{\text{ads}})_{\text{bare}}$  and  $\% \Delta E_{\text{ads}} = [(E_{\text{ads}})_{\text{thiolate}} - (E_{\text{ads}})_{\text{bare}}] / (E_{\text{ads}})_{\text{bare}} \times 100$

| Species           | $\Delta E_{\text{ads}} \text{ (kJ/mol)}$ |    |    |    |     | $\% \Delta E_{\text{ads}}$ |    |    |    |    |
|-------------------|------------------------------------------|----|----|----|-----|----------------------------|----|----|----|----|
|                   | Au                                       | Cu | Pt | Pd | Ni  | Au                         | Cu | Pt | Pd | Ni |
| CO*               | -7                                       | 8  | 22 | -8 | -20 | -13                        | 7  | 11 | -4 | -9 |
| CH <sub>3</sub> * | 10                                       | -2 | 9  | 1  | 5   | 6                          | -1 | 3  | 0  | 2  |
| H*                | 0                                        | 2  | 15 | 1  | 3   | 0                          | 1  | 5  | 0  | 1  |
| N*                | -14                                      | 10 | 36 | 9  | 10  | -6                         | 3  | 7  | 2  | 2  |
| OH*               | 2                                        | 17 | 38 | 18 | 16  | 2                          | 5  | 17 | 7  | 5  |
| O*                | -16                                      | 3  | 32 | 14 | 2   | -5                         | 1  | 8  | 3  | 0  |
| C*                | -36                                      | 17 | 41 | 9  | -5  | -8                         | 3  | 6  | 1  | -1 |

**Table S7.** Changes in properties of surface bound CO due to presence of the linker (I = imidazole, C = carboxylate, T = thiolate).

| Metal | Linker | $\Delta v$ (cm <sup>-1</sup> ) | $\Delta d_{C-O}$ (Å) | $\Delta q$ (e) | $\Delta E_{ads}$ |
|-------|--------|--------------------------------|----------------------|----------------|------------------|
| Au    | I      | -56                            | 0.007                | -0.09          | -6               |
| Cu    | I      | -89                            | 0.014                | -0.13          | -14              |
| Pt    | I      | -65                            | 0.009                | -0.10          | <b>2</b>         |
| Pd    | I      | -49                            | 0.008                | -0.08          | -18              |
| Ni    | I      | -76                            | 0.014                | -0.09          | -29              |
| Au    | T      | -44                            | 0.005                | -0.11          | -9               |
| Cu    | T      | -44                            | 0.006                | -0.05          | <b>1</b>         |
| Pt    | T      | -53                            | 0.008                | -0.14          | <b>19</b>        |
| Pd    | T      | -37                            | 0.006                | -0.06          | -13              |
| Ni    | T      | -58                            | 0.010                | -0.07          | -25              |
| Au    | C      | <b>15</b>                      | <b>-0.002</b>        | -0.03          | -19              |
| Cu    | C      | <b>10</b>                      | <b>-0.002</b>        | 0.02           | -11              |
| Pt    | C      | -20                            | 0.002                | 0.00           | <b>3</b>         |
| Pd    | C      | -10                            | 0.001                | -0.01          | -11              |
| Ni    | C      | -15                            | 0.003                | -0.02          | -11              |

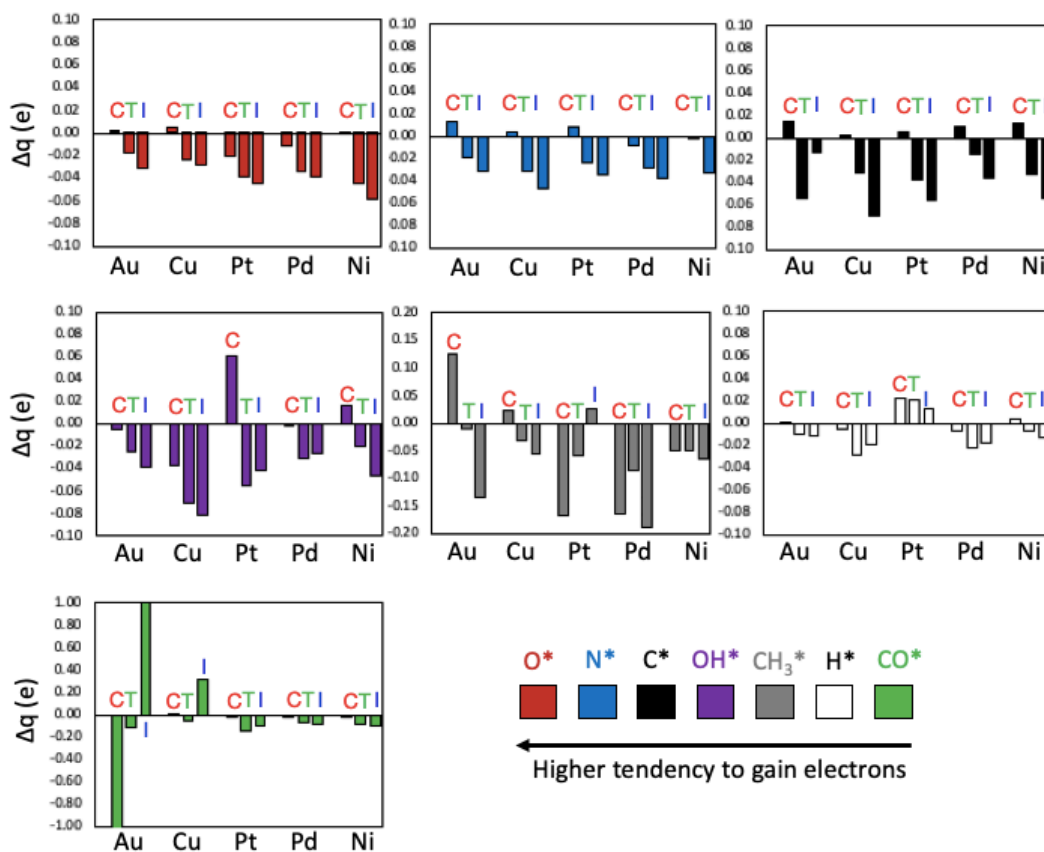

**Figure S11.** Change in adsorbate charge ( $\Delta q$ ) when binding in the presence of a coordinated linker versus when binding on the presence of the bare surface. One plot for each adsorbate, with bar colors indicating the adsorbate according to the bottom color guide.

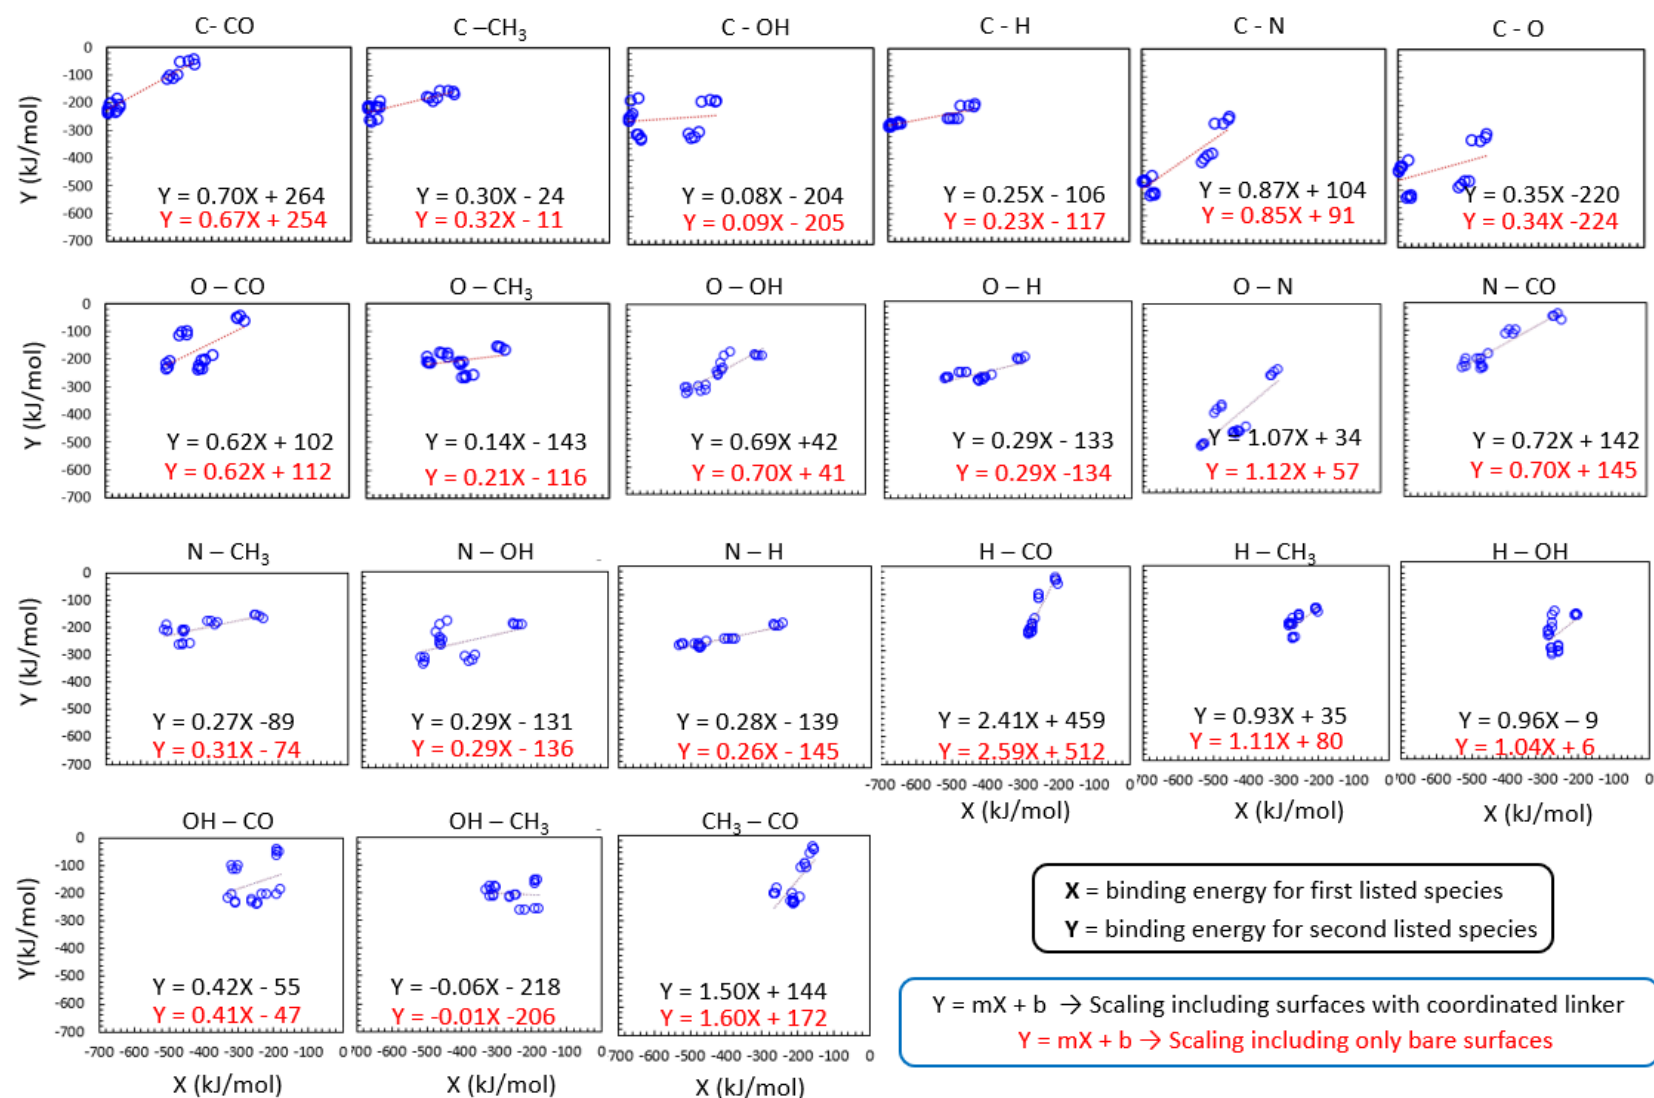

**Figure S12.** Effect of linker coordination on scaling relationships.

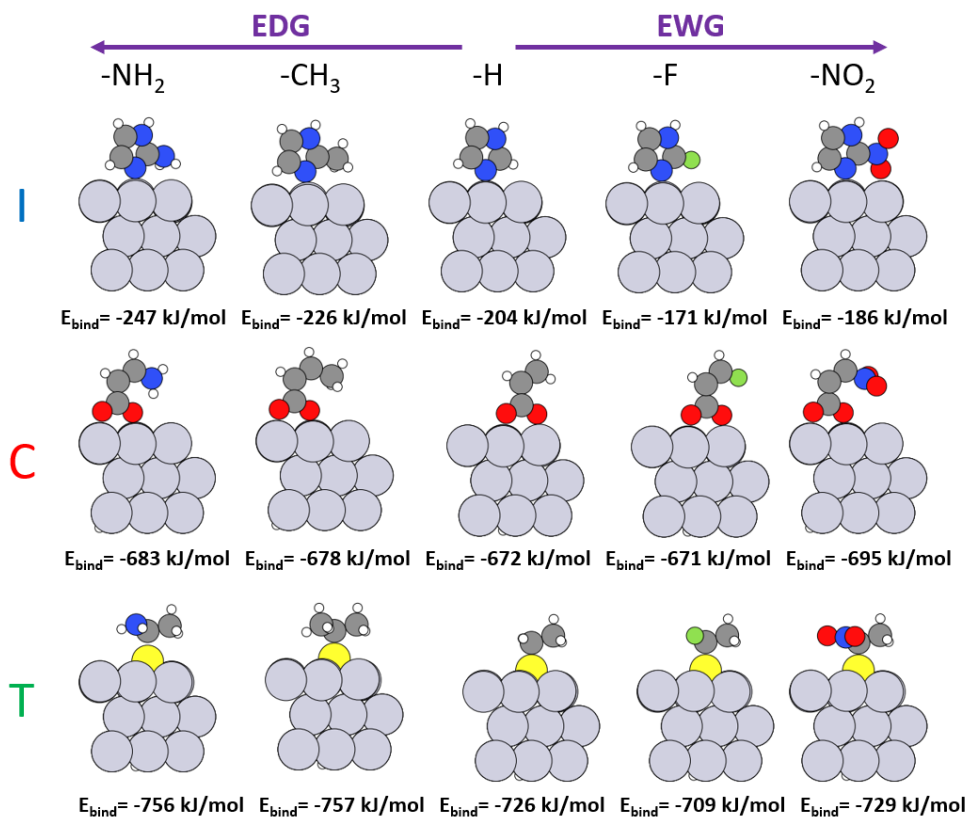

**Figure S13.** Optimized binding configuration of functionalized linkers on Pt(111) along with binding energy ( $E_{\text{bind}}$ ). I = imidazole, C = carboxylate, T = thiolate.

**Table S8.** Change in binding energy in kJ/mol for linker binding on Pt(111) due to linker functionalization.

| Functionalization | Organic linker |     |     |
|-------------------|----------------|-----|-----|
|                   | I              | C   | T   |
| -NO <sub>2</sub>  | 18             | -23 | -3  |
| -F                | 33             | 1   | -17 |
| -CH <sub>3</sub>  | -22            | -6  | -31 |
| -NH <sub>2</sub>  | -43            | -11 | -30 |



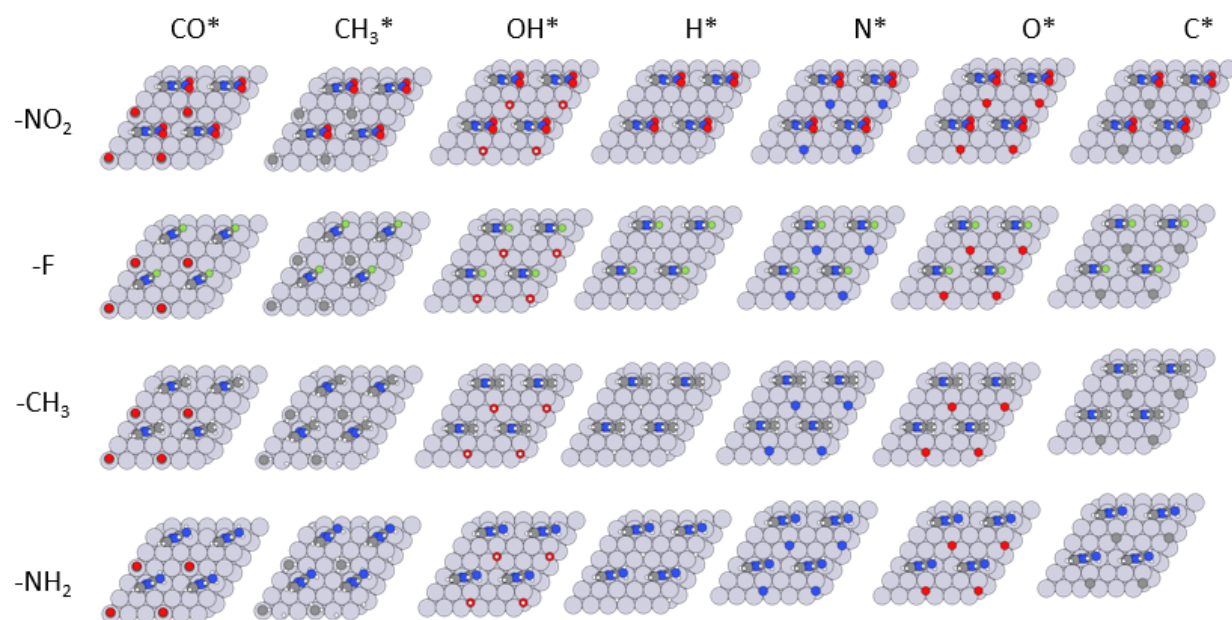

**Figure S14.** Optimized binding configuration of small adsorbates on Pt(111) in the presence of functionalized imidazole linker.

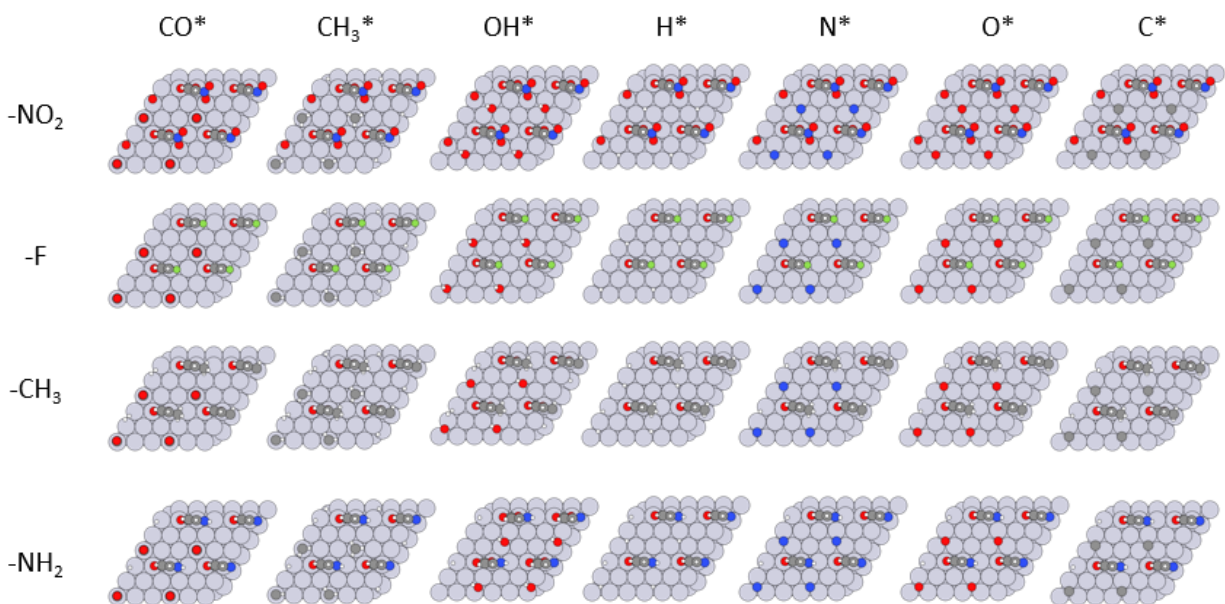

**Figure S15.** Optimized binding configuration of small adsorbates on Pt(111) in the presence of functionalized carboxylate linker.

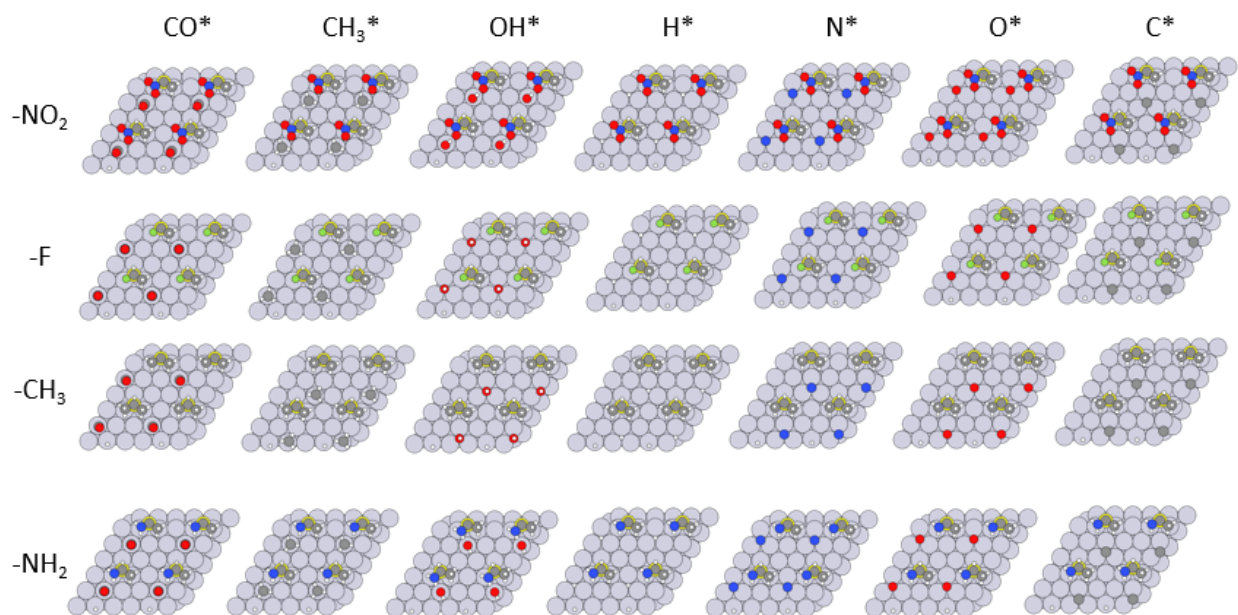

**Figure S16.** Optimized binding configuration of small adsorbates on Pt(111) in the presence of functionalized thiolate linker.

**Table S9.** Change in adsorption energy in kJ/mol for adsorbate binding on Pt(111) due to linker functionalization (change calculated relative to binding energy for corresponding unfunctionalized linker case).

|                   | imidazole        |    |                  |                  | carboxylate      |     |                  |                  | thiolate         |     |                  |                  |
|-------------------|------------------|----|------------------|------------------|------------------|-----|------------------|------------------|------------------|-----|------------------|------------------|
|                   | -NO <sub>2</sub> | -F | -CH <sub>3</sub> | -NH <sub>2</sub> | -NO <sub>2</sub> | -F  | -CH <sub>3</sub> | -NH <sub>2</sub> | -NO <sub>2</sub> | -F  | -CH <sub>3</sub> | -NH <sub>2</sub> |
| CO*               | 14               | -1 | 1                | 2                | -4               | -2  | -2               | -2               | 4                | 4   | 5                | 0                |
| CH <sub>3</sub> * | 19               | -1 | -1               | -3               | -4               | 1   | 0                | 2                | 4                | 4   | 10               | 1                |
| OH*               | -10              | 0  | -1               | -4               | 14               | -5  | -6               | -25              | -78              | -8  | 2                | -99              |
| H*                | 2                | 0  | 0                | -1               | -1               | 2   | 2                | 1                | 0                | 0   | 0                | 1                |
| N*                | 4                | -1 | -1               | 0                | -6               | -3  | -4               | -3               | -5               | -5  | 0                | -5               |
| O*                | 3                | -1 | -1               | 0                | -6               | -6  | -7               | -6               | -11              | -11 | 0                | -10              |
| C*                | 5                | -1 | -2               | -1               | -11              | -10 | -10              | -10              | 0                | 0   | -1               | -1               |

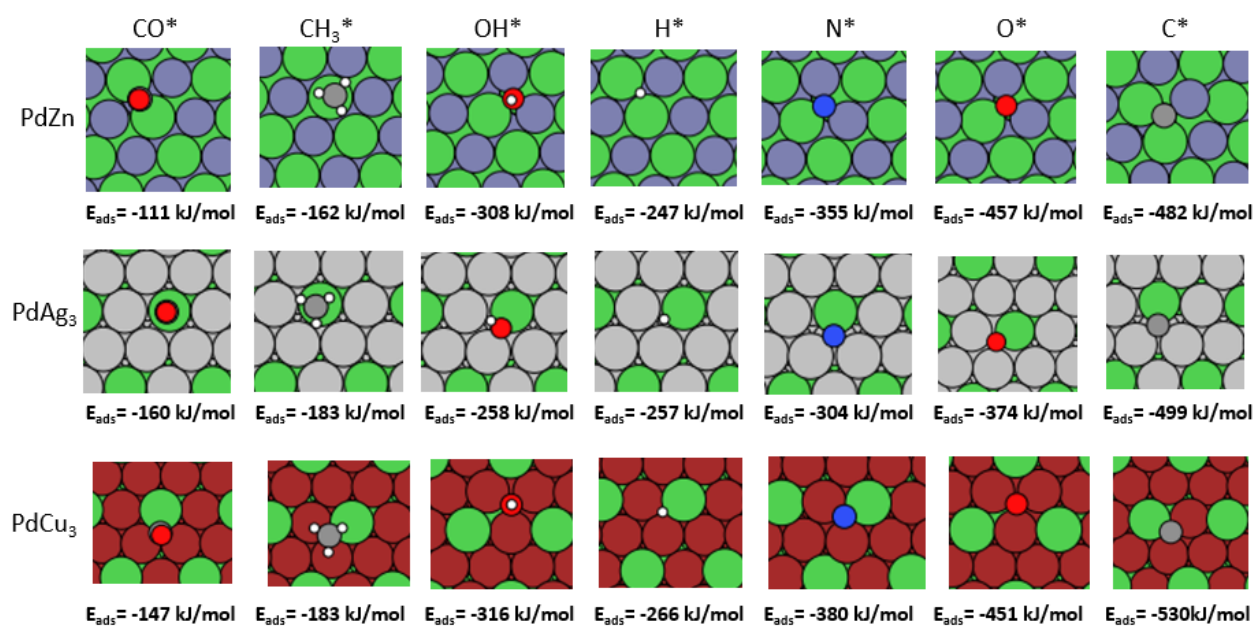

**Figure S17.** Optimized binding configuration of adsorbates in Pd alloys.



**Table S10.** Reactions for microkinetic model built in CatMap.

| Reaction number | Reaction                                                                                                                                                                       |
|-----------------|--------------------------------------------------------------------------------------------------------------------------------------------------------------------------------|
| 1               | $\text{C}_4\text{H}_9\text{OH}^* \leftrightarrow \text{C}_4\text{H}_9\text{OH}_{(\text{g})} + *$                                                                               |
| 2               | $\text{O}_{2(\text{g})} + * \leftrightarrow \text{O}_2^*$                                                                                                                      |
| 3               | $\text{H}_2\text{O}^* + \text{O}_2^* + * \leftrightarrow \text{H}_2\text{O}--\text{O}_2^* + 2* \rightarrow 2\text{OH}^* + \text{O}^*$                                          |
| 4               | $\text{C}_4\text{H}_{10(\text{g})} + * \leftrightarrow \text{C}_4\text{H}_{10}^*$                                                                                              |
| 5               | $2\text{H}^* \leftrightarrow \text{H}_{2(\text{g})} + 2*$                                                                                                                      |
| 6               | $\text{C}_4\text{H}_9^* + \text{O}^* \leftrightarrow \text{O}--\text{C}_4\text{H}_9^* + * \rightarrow \text{C}_4\text{H}_9\text{O}^* + *$                                      |
| 7               | $\text{C}_4\text{H}_9\text{O}^* + \text{H}^* \leftrightarrow \text{H}--\text{C}_4\text{H}_9\text{O}^* + * \rightarrow \text{C}_4\text{H}_9\text{OH}^* + *$                     |
| 8               | $\text{C}_4\text{H}_9^* + \text{OH}^* \leftrightarrow \text{OHH}--\text{C}_4\text{H}_8^* + * \rightarrow \text{C}_4\text{H}_8^* + \text{H}_2\text{O}^*$                        |
| 9               | $\text{C}_4\text{H}_8^* \leftrightarrow \text{C}_4\text{H}_7-\text{H}^*$                                                                                                       |
| 10              | $\text{C}_4\text{H}_8\text{O}^* \leftrightarrow \text{C}_4\text{H}_8\text{O}_{(\text{g})} + *$                                                                                 |
| 11              | $\text{C}_4\text{H}_7-\text{H}^* \leftrightarrow \text{C}_4\text{H}_8(\text{g}) + *$                                                                                           |
| 12              | $\text{C}_4\text{H}_9\text{O}^* + \text{OH}^* \leftrightarrow \text{OH}--\text{C}_4\text{H}_9\text{O}^* + * \rightarrow \text{C}_4\text{H}_8\text{O}^* + \text{H}_2\text{O}^*$ |
| 13              | $\text{C}_4\text{H}_{10}^* + \text{O}^* \leftrightarrow \text{O}--\text{C}_4\text{H}_{10}^* + * \rightarrow \text{C}_4\text{H}_9\text{O}^* + \text{H}^*$                       |
| 14              | $\text{C}_4\text{H}_9\text{O}^* + \text{O}^* \leftrightarrow \text{HO}--\text{C}_4\text{H}_8\text{O}^* + * \rightarrow \text{C}_4\text{H}_8\text{O}^* + \text{OH}^*$           |
| 15              | $\text{H}_2\text{O}^* + \text{O}^* \leftrightarrow \text{H}_2\text{O}--\text{O}^* + * \rightarrow 2\text{OH}^*$                                                                |
| 16              | $\text{C}_4\text{H}_9\text{O}^* + * \leftrightarrow \text{H}--\text{C}_4\text{H}_8\text{O}^* + * \rightarrow \text{C}_4\text{H}_8\text{O}^* + \text{H}^*$                      |
| 17              | $\text{O}_2^* + * \leftrightarrow \text{O}--\text{O}^* + * \rightarrow 2\text{O}^*$                                                                                            |
| 18              | $\text{H}_2\text{O}^* \leftrightarrow \text{H}_2\text{O}_{(\text{g})} + *$                                                                                                     |
| 19              | $\text{C}_4\text{H}_{10}^* + \text{O}^* \leftrightarrow \text{HOH}--\text{C}_4\text{H}_8^* + * \rightarrow \text{C}_4\text{H}_9^* + \text{OH}^*$                               |
| 20              | $\text{C}_4\text{H}_9\text{O}^* + \text{OH}^* \leftrightarrow \text{O}--\text{C}_4\text{H}_9\text{OH}^* + * \rightarrow \text{C}_4\text{H}_9\text{OH}^* + \text{O}^*$          |
| 21              | $\text{C}_4\text{H}_9^* + \text{OH}^* \leftrightarrow \text{OH}--\text{C}_4\text{H}_9^* + * \rightarrow \text{C}_4\text{H}_9\text{OH}^* + *$                                   |
| 22              | $\text{C}_4\text{H}_{10}^* + \text{OH}^* \leftrightarrow \text{OH}--\text{C}_4\text{H}_{10}^* + * \rightarrow \text{C}_4\text{H}_9^* + \text{H}_2\text{O}^*$                   |
| 23              | $\text{C}_4\text{H}_9^* + \text{O}^* \leftrightarrow \text{OH}--\text{C}_4\text{H}_8^* + * \rightarrow \text{C}_4\text{H}_8^* + \text{OH}^*$                                   |
| 24              | $\text{C}_4\text{H}_{10}^* + * \leftrightarrow \text{H}--\text{C}_4\text{H}_9^* + * \rightarrow \text{C}_4\text{H}_9^* + \text{H}^*$                                           |

**Table S11.** Formation energies of C\* and OH\* in kJ/mol.

| Metal | Bare |     | Imidazole |     | Carboxylate |     | Thiolate |     |
|-------|------|-----|-----------|-----|-------------|-----|----------|-----|
|       | C*   | OH* | C*        | OH* | C*          | OH* | C*       | OH* |
| Zn    | 373  | -6  | -         | -   | -           | -   | -        | -   |
| Ag    | 500  | 16  | -         | -   | -           | -   | -        | -   |
| Au    | 443  | 111 | 429       | 117 | 449         | 115 | 407      | 113 |
| Cu    | 375  | -19 | 367       | -4  | 379         | -19 | 392      | -2  |
| Pt    | 187  | 82  | 202       | 112 | 208         | 64  | 228      | 120 |
| Pd    | 197  | 40  | 197       | 51  | 200         | 42  | 206      | 58  |
| PdZn  | 412  | -7  | -         | -   | -           | -   | -        | -   |
| PdAg3 | 396  | 42  | -         | -   | -           | -   | -        | -   |
| PdCu3 | 364  | -15 | -         | -   | -           | -   | -        | -   |
| Ni    | 230  | -19 | 217       | -6  | 234         | -22 | 225      | -24 |

## Section S2. Model Training Details

The R package `gbm` was used to build all GBM models. We employed the gradient descent algorithm described by Friedman<sup>3</sup> and implemented in the aforementioned package. Each GBM model was tuned on a hyperparameter grid that included interaction depth (the number of splits performed for each of the individual decision trees), the number of trees (i.e. iterations), shrinkage (or the learning rate), and the number minimum number of training observations in the terminal nodes of the individual tree. The grid search yielded values of 9, 100, 0.2, and 10, for these parameters, respectively. The error for each model corresponding to a point on the hyperparameter grid was estimated using three times repeated 10-fold cross validation with random partitioning. The method outlined in Friedman<sup>3</sup> was used to calculate variable importance using our final GBM model. Given the small amount of data we used for fitting, we did not hold out a final test set to plot for a final validation, but rather plotted the predictions the model made on the hold-out set of each cross-validation fold. With this in mind, and again considering the breadth of our training data, we do not consider our final model to be generally predictive. However, the variable importance metrics derived from training are worthy of scrutiny (similar to how the weights of a linear model are commonly analyzed).

## References

1. T. H. Yu *et al.* Finding Correlations of the Oxygen Reduction Reaction Activity of Transition Metal Catalysts with Parameters Obtained from Quantum Mechanics. *J. Phys. Chem. C* **117**, 26598–26607 (2013).
2. F. Abild-Pedersen *et al.* Scaling Properties of Adsorption Energies for Hydrogen-Containing Molecules on Transition-Metal Surfaces. *Phys. Rev. Lett.* **99**, 16105 (2007).
3. J. H. Friedman, Greedy Function Approximation : A Gradient Boosting Machine. *Ann. Stat.* **29**, 1189–1232 (2001).
